# Supplementary material for: Performance of diagnostic and predictive host blood transcriptomic signatures for Tuberculosis disease: A systematic review and meta-analysis
Source: PubMed Central journal article supplement (PMC7442252; doi:10.1371/journal.pone.0237574), 2020-08-21
Supplement: pone.0237574.s005.pdf [file pone.0237574.s005.pdf]

# Performance of diagnostic and predictive host blood transcriptomic signatures for tuberculosis disease: a systematic review and meta-analysis.

## Methods:

### Quality assessment.

For each of the four domains in QUADAS-2, namely 'patient selection', 'index test', 'reference standard' and 'flow and timing', risk of bias was scored as 'low' if all responses in that domain were answered as 'yes', 'high' if any of the responses were answered as 'no' or 'unclear' and 'unclear' if it was unclear for all the responses. Similarly, we judged "low applicability concerns" in each domain if all signalling questions in that domain were answered as 'yes', "high applicability concerns" if any question was answered as 'no' and "unclear applicability concerns" if answered as such.

For the item "Patient Selection", we considered a prospective or cross-sectional study design with consecutively or randomly enrolled participants as low risk and a case-control design as high risk of bias. For diagnostic studies, we considered a clinically relevant control population (such as individuals with other diseases (OD)) as low "applicability concerns" in patient selection. High "applicability concerns" were for control groups involving household TB contacts (HHC) or individuals with latent TB infection (LTBI). Therefore, a score of "low" for patient selection in studies of TB diagnosis, meant that participants included an OD control group who were consecutively or randomly enrolled in a prospective, cohort or cross-sectional study. For studies of prediction to TB disease, we considered HHC or LTBI individuals as low "applicability concerns" in patient selection. High "applicability concerns" were for populations involving healthy uninfected participants with no known close contact to a person with active TB disease. Therefore, a score of "low" for patient selection in studies of prediction to TB disease meant that the population involved LTBI or HHC participants who were consecutively or randomly enrolled in a prospective, cohort or cross-sectional study. For the "Index Test", we considered whether the signature was interpreted without the knowledge of the reference standard; blinding to index test status was considered low risk of bias. Applicability concerns for the index test were considered low if blinding to index test status done and high if not done. For the "Reference Standard", we considered whether the reference standard included MTB culture, Xpert MTB/RIF, or smear microscopy and therefore likely to classify TB disease correctly. Therefore, a score of "low" for risk of bias implied utilisation of MTB culture, Xpert MTB/RIF, or smear microscopy as reference standards. Applicability concerns were low if MTB culture, Xpert MTB/RIF, or smear microscopy were used as a reference standard and high if none of the three reference standards were used. For "Flow and Timing", we considered whether all participants were evaluated using the same reference standard and whether they were all included in the analysis, suggesting low risk of bias and high risk if the opposite happened.

## Results

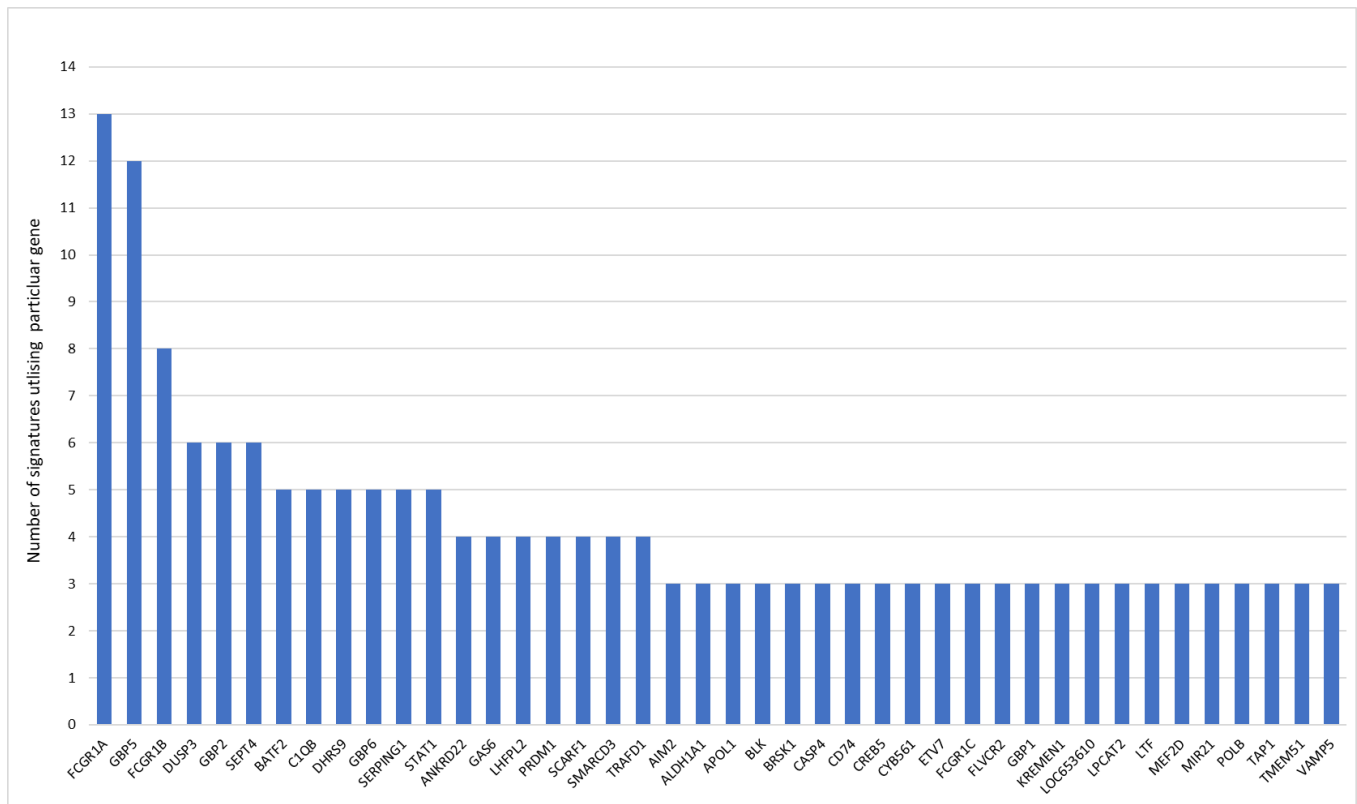

Fig 1. Column chart of forty-two most frequently utilised genes in transcriptomic signatures of either TB diagnosis or prediction to TB disease.

### S3\_File: Manuscript-specific supplementary material

| Study Name     | Signature       | Patient Selection |                        | Index Test   |                        | Reference Standard |                        | Flow & Timing |
|----------------|-----------------|-------------------|------------------------|--------------|------------------------|--------------------|------------------------|---------------|
|                |                 | Risk of Bias      | Applicability Concerns | Risk of Bias | Applicability Concerns | Risk of Bias       | Applicability Concerns | Risk of Bias  |
| Berry2010a     | Berry393_2010   | LR                | HR                     | UC           | UC                     | LR                 | LR                     | LR            |
| Berry2010b     | Berry86_2010    | LR                | LR                     | UC           | UC                     | LR                 | LR                     | LR            |
| Bloom2013      | Bloom144_2010   | HR                | LR                     | UC           | UC                     | LR                 | LR                     | LR            |
| daCosta2015a   | daCosta2_2015   | HR                | LR                     | UC           | UC                     | LR                 | LR                     | LR            |
| daCosta2015b   | daCosta3_2015   | HR                | LR                     | UC           | UC                     | LR                 | LR                     | LR            |
| Dawany2015a    | Dewany251_2015  | HR                | HR                     | UC           | UC                     | LR                 | LR                     | LR            |
| Dawany2015b    | Dewany251_2015  | HR                | HR                     | UC           | UC                     | LR                 | LR                     | LR            |
| Dawany2015c    | Dewany251_2015  | HR                | HR                     | UC           | UC                     | LR                 | LR                     | LR            |
| Dawany2015d    | Dewany251_2015  | HR                | HR                     | UC           | UC                     | LR                 | LR                     | LR            |
| Dawany2015e    | Dewany251_2015  | HR                | HR                     | UC           | UC                     | LR                 | LR                     | LR            |
| Dawany2015f    | Dewany251_2015  | HR                | HR                     | UC           | UC                     | LR                 | LR                     | LR            |
| DeAraujo2016a  | DeAraujo1_2016  | HR                | HR                     | LR           | LR                     | LR                 | LR                     | LR            |
| DeAraujo2016b  | DeAraujo1_2016  | HR                | HR                     | LR           | LR                     | LR                 | LR                     | LR            |
| DeAraujo2016c  | DeAraujo1_2016  | HR                | HR                     | LR           | LR                     | LR                 | LR                     | LR            |
| DeAraujo2016d  | DeAraujo1_2016  | HR                | HR                     | LR           | LR                     | LR                 | LR                     | LR            |
| Francisco2017a | Francisco2_2017 | HR                | HR                     | UC           | UC                     | LR                 | LR                     | LR            |
| Francisco2017b | Sweeney3_2016   | HR                | LR                     | UC           | UC                     | LR                 | LR                     | LR            |
| Francisco2017c | Francisco2_2017 | HR                | HR                     | UC           | UC                     | LR                 | LR                     | LR            |
| Francisco2017d | Sweeney3_2016   | HR                | LR                     | UC           | UC                     | LR                 | LR                     | LR            |
| Francisco2017e | Francisco2_2017 | HR                | LR                     | UC           | UC                     | LR                 | LR                     | LR            |
| Francisco2017f | Sweeney3_2016   | HR                | LR                     | UC           | UC                     | LR                 | LR                     | LR            |
| Huang2015a     | Huang13_2015    | HR                | LR                     | UC           | UC                     | LR                 | LR                     | LR            |
| Huang2018      | Huang1_2018     | HR                | HR                     | UC           | UC                     | UC                 | UC                     | UC            |
| Kaforou2013a   | Kaforou27_2013  | HR                | HR                     | UC           | UC                     | LR                 | LR                     | LR            |
| Kaforou2013b   | Kaforou44_2013  | HR                | LR                     | UC           | UC                     | LR                 | LR                     | LR            |
| Kaforou2013c   | Berry393_2010   | HR                | HR                     | UC           | UC                     | LR                 | LR                     | LR            |
| Kaforou2013d   | Berry86_2010    | HR                | LR                     | UC           | UC                     | LR                 | LR                     | LR            |
| Lee2016a       | Lee2_2016       | HR                | HR                     | UC           | UC                     | LR                 | LR                     | LR            |
| Lee2016b       | Lee3_2016       | HR                | HR                     | UC           | UC                     | LR                 | LR                     | LR            |
| Leong2018a     | Berry393_2010   | LR                | HR                     | UC           | UC                     | LR                 | LR                     | LR            |
| Leong2018b     | Berry86_2010    | LR                | HR                     | UC           | UC                     | LR                 | LR                     | LR            |
| Leong2018c     | Jacobsen3_2007  | LR                | HR                     | UC           | UC                     | LR                 | LR                     | LR            |
| Leong2018d     | Kaforou27_2013  | LR                | HR                     | UC           | UC                     | LR                 | LR                     | LR            |
| Leong2018e     | Sambarey10_2017 | LR                | HR                     | UC           | UC                     | LR                 | LR                     | LR            |
| Leong2018f     | Sweeney3_2016   | LR                | HR                     | UC           | UC                     | LR                 | LR                     | LR            |
| Leong2018g     | Zak16_2016      | LR                | HR                     | UC           | UC                     | LR                 | LR                     | LR            |
| Lu2011         | Lu3_2011        | HR                | HR                     | UC           | UC                     | LR                 | LR                     | LR            |
| Pan2017a       | Pan2_2017       | HR                | HR                     | UC           | UC                     | LR                 | LR                     | LR            |
| Pan2017b       | Pan2_2017       | HR                | HR                     | UC           | UC                     | LR                 | LR                     | LR            |
| Sambarey2017a  | Sambarey10_2017 | HR                | HR                     | UC           | UC                     | LR                 | LR                     | LR            |
| Sambarey2017b  | Sambarey10_2017 | HR                | LR                     | UC           | UC                     | LR                 | LR                     | LR            |
| Sambarey2017c  | Sambarey10_2017 | HR                | HR                     | UC           | UC                     | LR                 | LR                     | LR            |
| Sambarey2017d  | Sambarey10_2017 | HR                | LR                     | UC           | UC                     | LR                 | LR                     | LR            |
| Sweeney2016a   | Sweeney3_2016   | HR                | HR                     | UC           | UC                     | LR                 | LR                     | LR            |
| Sweeney2016b   | Sweeney3_2016   | HR                | HR                     | UC           | UC                     | LR                 | LR                     | LR            |
| Sweeney2016c   | Sweeney3_2016   | HR                | HR                     | UC           | UC                     | LR                 | LR                     | LR            |
| Sweeney2016d   | Sweeney3_2016   | HR                | HR                     | UC           | UC                     | LR                 | LR                     | LR            |
| Sweeney2016e   | Sweeney3_2016   | HR                | LR                     | UC           | UC                     | LR                 | LR                     | LR            |
| Walter2016a    | Walter47_2016   | HR                | LR                     | UC           | UC                     | LR                 | LR                     | LR            |
| Walter2016b    | Walter51_2016   | HR                | HR                     | UC           | UC                     | LR                 | LR                     | LR            |
| Walter2016c    | Walter119_2016  | HR                | LR                     | UC           | UC                     | LR                 | LR                     | LR            |
| Walter2016d    | Berry393_2010   | HR                | HR                     | UC           | UC                     | LR                 | LR                     | LR            |
| Walter2016e    | Berry86_2010    | HR                | LR                     | UC           | UC                     | LR                 | LR                     | LR            |
| Walter2016f    | Bloom144_2010   | HR                | LR                     | UC           | UC                     | LR                 | LR                     | LR            |
| Walter2016g    | Kaforou27_2013  | HR                | HR                     | UC           | UC                     | LR                 | LR                     | LR            |
| Walter2016h    | Kaforou44_2013  | HR                | LR                     | UC           | UC                     | LR                 | LR                     | LR            |
| Walter2016i    | Kaforou53_2013  | HR                | LR                     | UC           | UC                     | LR                 | LR                     | LR            |
| Warsinske2018a | Sweeney3_2016   | HR                | LR                     | UC           | UC                     | LR                 | LR                     | HR            |
| Zak2016a       | Zak16_2016      | LR                | HR                     | UC           | UC                     | LR                 | LR                     | LR            |
| Zak2016b       | Zak16_2016      | LR                | HR                     | UC           | UC                     | LR                 | LR                     | LR            |
| Zak2016c       | Zak16_2016      | LR                | HR                     | UC           | UC                     | LR                 | LR                     | LR            |
| Zak2016d       | Zak16_2016      | LR                | HR                     | UC           | UC                     | LR                 | LR                     | LR            |
| Zak2016e       | Zak16_2016      | LR                | HR                     | UC           | UC                     | LR                 | LR                     | LR            |
| Zak2016f       | Zak16_2016      | LR                | HR                     | UC           | UC                     | LR                 | LR                     | LR            |
| Zak2016g       | Zak16_2016      | LR                | LR                     | UC           | UC                     | LR                 | LR                     | LR            |
| Zak2016h       | Zak16_2016      | LR                | LR                     | UC           | UC                     | LR                 | LR                     | LR            |
| Zak2016i       | Zak16_2016      | LR                | LR                     | UC           | UC                     | LR                 | LR                     | LR            |
| Zak2016j       | Zak16_2016      | LR                | LR                     | UC           | UC                     | LR                 | LR                     | LR            |
| Zak2016k       | Zak16_2016      | LR                | LR                     | UC           | UC                     | LR                 | LR                     | LR            |
| Zak2016l       | Zak16_2016      | LR                | HR                     | UC           | UC                     | LR                 | LR                     | LR            |

## S3\_File: Manuscript-specific supplementary material

**Fig 2.** Methodological quality summary of all diagnostic studies with independent validation cohorts. LR; Low risk, HR; High risk, UC; Unclear

| Study Name       | Signature          | Patient Selection |                        | Index Test   |                        | Reference Standard |                        | Flow & Timing |
|------------------|--------------------|-------------------|------------------------|--------------|------------------------|--------------------|------------------------|---------------|
|                  |                    | Risk of Bias      | Applicability Concerns | Risk of Bias | Applicability Concerns | Risk of Bias       | Applicability Concerns | Risk of Bias  |
| Cai2014a         | Cai1_2014          | HR                | HR                     | UC           | UC                     | LR                 | LR                     | LR            |
| Cai2014b         | Cai1_2014          | HR                | HR                     | UC           | UC                     | LR                 | LR                     | LR            |
| Darboe2018       | Darboe11_2018      | HR                | HR                     | UC           | UC                     | LR                 | LR                     | LR            |
| Leong2018h       | Leong24_2018       | HR                | HR                     | UC           | UC                     | LR                 | LR                     | LR            |
| Lesho2011        | Lesho127_2011      | HR                | HR                     | UC           | UC                     | LR                 | LR                     | LR            |
| Maertzdolf2011a  | Maertzdolf3_2011   | HR                | HR                     | UC           | UC                     | LR                 | LR                     | LR            |
| Maertzdolf2011b  | Maertzdolf5_2011   | HR                | HR                     | UC           | UC                     | LR                 | LR                     | LR            |
| Satproedprai2015 | Satproedprai7_2015 | HR                | HR                     | UC           | UC                     | LR                 | LR                     | LR            |
| Serrano2016      | Serrano2_2016      | HR                | HR                     | UC           | UC                     | LR                 | LR                     | LR            |
| Wu2007           | Wu10_2007          | HR                | HR                     | UC           | UC                     | LR                 | LR                     | LR            |

**Fig 3.** Methodological quality summary of all diagnostic studies without independent validation cohorts. LR; Low risk, HR; High risk, UC; Unclear

| Study Name     | Signature     | Patient Selection |                        | Index Test   |                        | Reference Standard |                        | Flow & Timing |
|----------------|---------------|-------------------|------------------------|--------------|------------------------|--------------------|------------------------|---------------|
|                |               | Risk of Bias      | Applicability Concerns | Risk of Bias | Applicability Concerns | Risk of Bias       | Applicability Concerns | Risk of Bias  |
| Roe2019b       | Roe3_2019     | LR                | LR                     | UC           | UC                     | HR                 | HR                     | LR            |
| Suliman2018b   | Suliman4_2018 | LR                | LR                     | LR           | LR                     | LR                 | LR                     | LR            |
| Warsinske2018b | Sweeney3_2016 | LR                | LR                     | LR           | LR                     | LR                 | LR                     | LR            |
| Zak2016p       | Zak16_2016    | LR                | LR                     | LR           | LR                     | LR                 | LR                     | LR            |

**Fig 4.** Methodological quality summary of studies of prediction to TB disease in independent validation cohorts. LR; Low risk, HR; High risk, UC; Unclear

### S3\_File: Manuscript-specific supplementary material

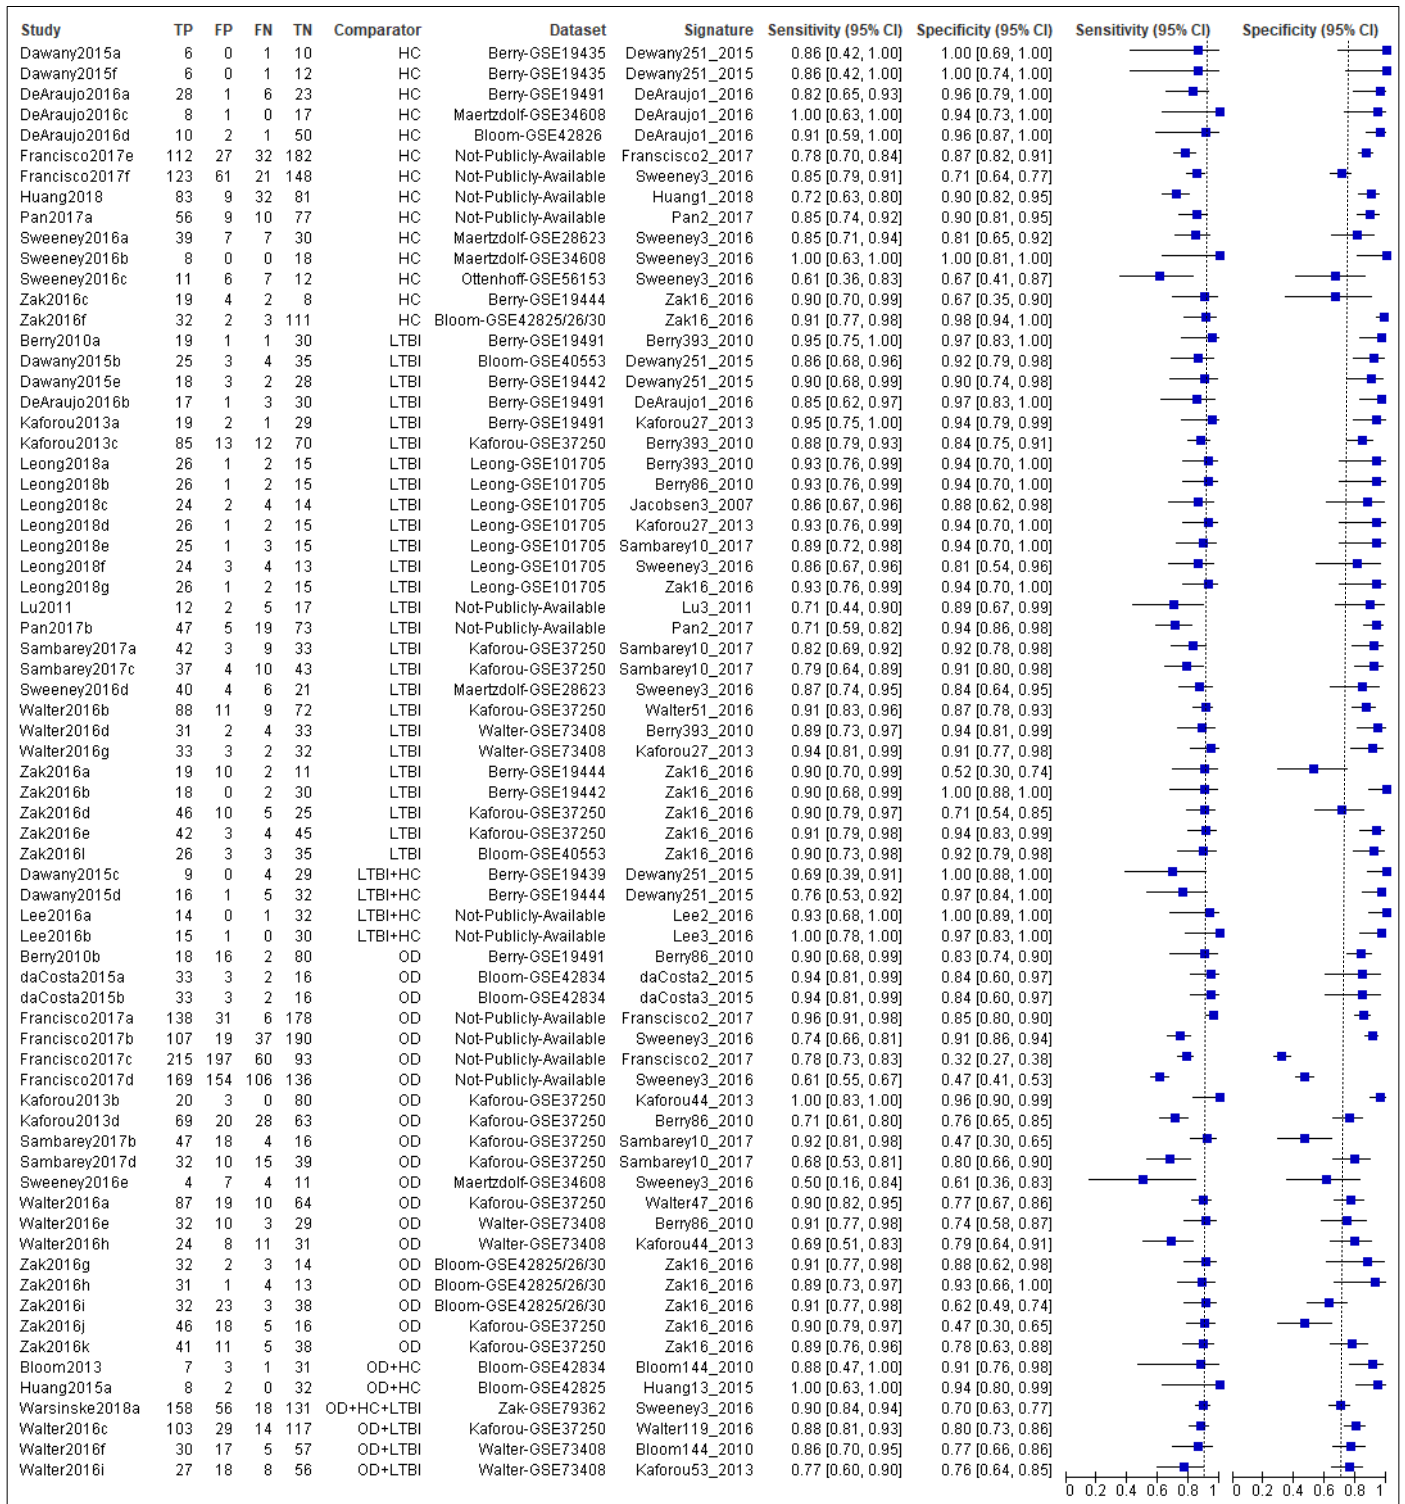

**Fig 5.** Forest plots of sensitivity and specificity of mRNA transcriptomic signatures for diagnosis of TB disease in independent validation cohorts (all studies). *HC*; Healthy Controls, *LTBI*; Latent TB infection, *OD*; Other diseases. Each signature validated in a different population is represented as a separate entry. Vertical dotted lines correspond to 90% sensitivity and 70% specificity

### S3\_File: Manuscript-specific supplementary material

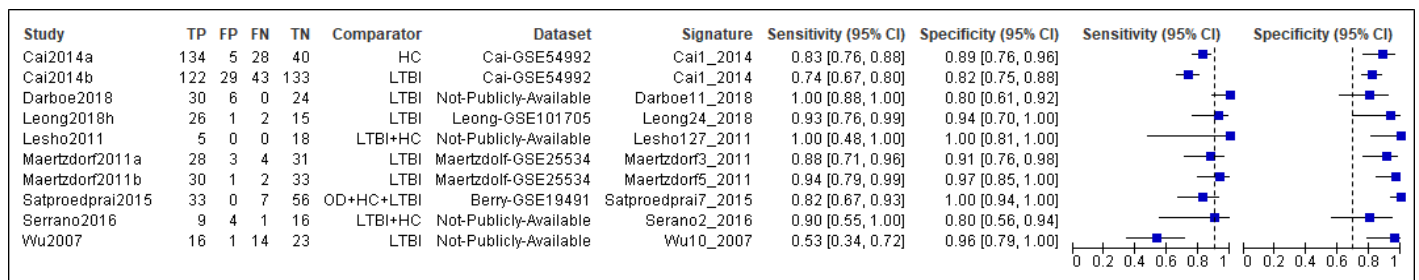

**Fig 6.** Forest plots of sensitivity and specificity of mRNA transcriptomic signatures for diagnosis of TB disease for studies without independent validation cohorts. *HC; Healthy Controls, LTBI; Latent TB infection, OD; Other diseases.* Each signature validated in a different population is represented as a separate entry. Vertical dotted lines correspond to 90% sensitivity and 70% specificity

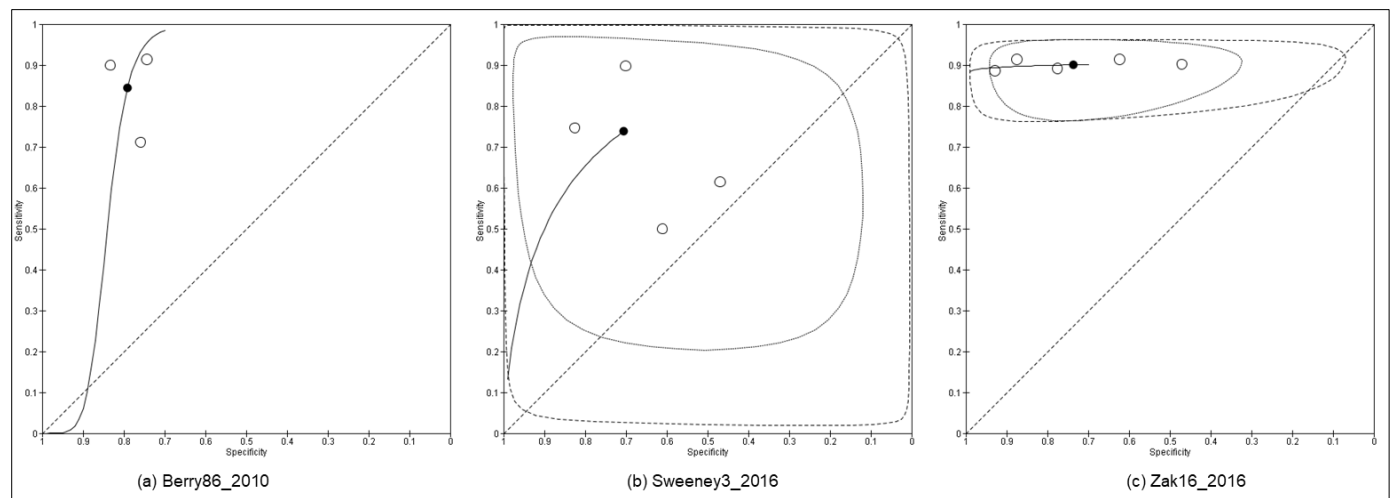

**Fig 7.** Summary receiver operating characteristic (SROC) curves for the Berry86\_2010, Sweeney3\_2016 and Zak16\_2016 signatures. *Black dot is the summary estimate, white circles are individual study estimates, solid line passing through summary estimate is SROC curve. Solid line around estimates is 95% confidence region, dashed line around estimates is 95% prediction region*

| Outcome         | Study design                        | # Studies (Sample size) | Risk of bias (Study limitations) | Inconsistence                  | Indirectness                         | Imprecision               | Publication bias    | Final quality | Effect per 100,000                 | Importance <sup>1</sup> |
|-----------------|-------------------------------------|-------------------------|----------------------------------|--------------------------------|--------------------------------------|---------------------------|---------------------|---------------|------------------------------------|-------------------------|
| True Positives  | Cohort, Case-Control, Cross-Section | 70 (7,765)              | Very serious <sup>2</sup> (-2)   | Very serious <sup>3</sup> (-2) | No serious indirectness <sup>4</sup> | Serious <sup>5</sup> (-1) | Likely <sup>6</sup> | Very low @000 | Prevalence <sup>7</sup> 2%: 1,780  | Critical                |
| True Negative   | Cohort, Case-Control, Cross-Section | 70 (7,765)              | Very serious <sup>2</sup> (-2)   | Very serious <sup>3</sup> (-2) | No serious indirectness <sup>4</sup> | Serious <sup>5</sup> (-1) | Likely <sup>6</sup> | Very low @000 | Prevalence <sup>7</sup> 2%: 88,200 | Critical                |
| False Positives | Cohort, Case-Control, Cross-Section | 70 (7,765)              | Very serious <sup>2</sup> (-2)   | Very serious <sup>3</sup> (-2) | No serious indirectness <sup>4</sup> | Serious <sup>5</sup> (-1) | Likely <sup>6</sup> | Very low @000 | Prevalence <sup>7</sup> 2%: 9,800  | Critical                |
| False Negatives | Cohort, Case-Control, Cross-Section | 70 (7,765)              | Very serious <sup>2</sup> (-2)   | Very serious <sup>3</sup> (-2) | No serious indirectness <sup>4</sup> | Serious <sup>5</sup> (-1) | Likely <sup>6</sup> | Very low @000 | Prevalence <sup>7</sup> 2%: 220    | Critical                |

- The Importance of outcomes was classified as either "Critical", "Important" or "Not important" according to their relative importance
- Majority of studies were case-controls and lacked both a representative patient spectrum and blinding
- Substantial heterogeneity was observed in the study results
- No downgrade was applied for indirectness though diagnostic accuracy is considered a surrogate for patient-important outcomes.
- Diagnostic accuracy estimates were not pooled. There was a considerable number of studies with wide 95% CI. We down-graded by one point only, as there were a large number of studies and we had already down-graded for inconsistency
- We did not down-grade for publication bias. The data in this systematic review did not allow for formal assessment of publication bias with methods such as funnel plots or regression analysis. Publication bias can not be ruled out as studies may not have been published in which mRNA signatures showed poor diagnostic accuracy for TB
- What is the meaning of these results among people being screened for TB disease, given a 2% prevalence of disease

**Explanation:** Based on a sample size of 7,765, median sensitivity=89.5% and median specificity=90%, we rated the quality of the evidence as high when no points were subtracted, moderate when only one point was subtracted, low when two points were subtracted and very low when more than two points were subtracted. Deduction of points was based on the five factors that decrease study quality; study limitations, inconsistency in results across studies, indirectness in evidence, imprecision in summary estimates, and possibility of reporting bias. For each outcome, evidence from cohort and cross-sectional studies started as high quality while that from case-control studies started as moderate quality. We deducted two, one and zero points for "very serious", "serious", and "no serious" issues identified respectively, and the deducted points are shown in brackets. Reporting bias was classified as either "very likely", "likely" and "not likely".

**Figure 8.** GRADE evidence profile: mRNA signatures for the diagnosis of TB (all studies).

### S3\_File: Manuscript-specific supplementary material

**Table 1.** Characteristics of studies for diagnosis of TB included in the systematic review.

| Ref | Study Name   | Study Entry ID | Signature Name | Biomarker Description    | Dataset        | Signature discovery model * | Control Type | TB | Controls | Sens [95% CI]     | Spec [95% CI]     | AUC  | Validation Set | Index Sample | TB reference standard | Population | Sample Country       |
|-----|--------------|----------------|----------------|--------------------------|----------------|-----------------------------|--------------|----|----------|-------------------|-------------------|------|----------------|--------------|-----------------------|------------|----------------------|
| 23  | Berry 2010   | Berry2010a     | Berry393_2010  | 393 transcript signature | Berry-GSE19491 | K nearest neighbour         | LTBI         | 20 | 31       | 0.95 [0.75, 1.00] | 0.97 [0.83, 1.00] | NR   | Y              | Whole Blood  | Culture               | Adults     | South Africa, Malawi |
|     |              | Berry2010b     | Berry86_2010   | 86 transcript signature  | Berry-GSE19491 |                             | OD           | 20 | 96       | 0.90 [0.68, 0.99] | 0.83 [0.74, 0.90] | NR   | Y              |              |                       |            |                      |
| 38  | Bloom 2013   | Bloom2013      | Bloom144_2010  | 144 transcript signature | Bloom-GSE42834 | Support vector machine      | OD+HC        | 8  | 34       | 0.88 [0.47, 1.00] | 0.91 [0.76, 0.98] | NR   | Y              | Whole Blood  | Culture               | Adults     | South Africa         |
| 49  | DaCosta 2015 | DaCosta2015a   | daCosta2_2015  | GBP5; FCGR1A             | Bloom-GSE42834 | Random forest               | OD           | 35 | 19       | 0.94 [0.81, 0.99] | 0.84 [0.60, 0.97] | 0.96 | Y              | Whole Blood  | Culture               | Adults     | South Africa         |
|     |              | DaCosta2015b   | daCosta3_2015  | GBP5; FCGR1A; GZMA       | Bloom-GSE42834 |                             | OD           | 35 | 19       | 0.94 [0.81, 0.99] | 0.84 [0.60, 0.97] | 0.96 | Y              |              |                       |            |                      |
| 42  | Dawany 2015  | Dawany2015a    | Dewany251_2015 | 251 transcript signature | Berry-GSE19435 | Support vector machine      | HC           | 7  | 10       | 0.86 [0.42, 1.00] | 1.00 [0.69, 1.00] | 1.00 | Y              | Whole Blood  | Culture               | Adults     | UK                   |
|     |              | Dawany2015b    | Dewany251_2015 |                          | Bloom-GSE40553 |                             | LTBI         | 29 | 38       | 0.86 [0.68, 0.96] | 0.92 [0.79, 0.98] | 0.97 | Y              |              |                       |            | South Africa         |
|     |              | Dawany2015c    | Dewany251_2015 |                          | Berry-GSE19439 |                             | LTBI+HC      | 13 | 29       | 0.69 [0.39, 0.91] | 1.00 [0.88, 1.00] | 0.94 | Y              |              |                       |            | UK                   |
|     |              | Dawany2015d    | Dewany251_2015 |                          | Berry-GSE19444 |                             | LTBI+HC      | 21 | 33       | 0.76 [0.53, 0.92] | 0.97 [0.84, 1.00] | 0.89 | Y              |              |                       |            | UK                   |
|     |              | Dawany2015e    | Dewany251_2015 |                          | Berry-GSE19442 |                             | LTBI         | 20 | 31       | 0.90 [0.68, 0.99] | 0.90 [0.74, 0.98] | 0.92 | Y              |              |                       |            | South Africa         |

S3\_File: Manuscript-specific supplementary material

|    |                |                |                 |                         |                     |                        |       |     |     |                      |                      |      |   |             |                 |        |              |
|----|----------------|----------------|-----------------|-------------------------|---------------------|------------------------|-------|-----|-----|----------------------|----------------------|------|---|-------------|-----------------|--------|--------------|
|    |                | Dawany2015f    | Dewany251_2015  |                         | Berry-GSE19435      |                        | HC    | 7   | 12  | 0.86<br>[0.42, 1.00] | 1.00<br>[0.74, 1.00] | 0.98 | Y |             |                 |        | UK           |
| 43 | DeAraujo 2016  | DeAraujo2016a  | DeAraujo1_2016  | NPC2                    | Berry-GSE19491      | Classification tree    | HC    | 34  | 24  | 0.82<br>[0.65, 0.93] | 0.96<br>[0.79, 1.00] | 0.95 | Y | Whole Blood | Culture         | Adults | UK           |
|    |                | DeAraujo2016b  | DeAraujo1_2016  | NPC2                    | Berry-GSE19491      |                        | LTBI  | 20  | 31  | 0.85<br>[0.62, 0.97] | 0.97<br>[0.83, 1.00] | 0.97 | Y |             |                 |        | South Africa |
|    |                | DeAraujo2016c  | DeAraujo1_2016  | NPC2                    | Maertzdorf-GSE34608 |                        | HC    | 8   | 18  | 1.00<br>[0.63, 1.00] | 0.94<br>[0.73, 1.00] | 0.99 | Y |             |                 |        | Germany      |
|    |                | DeAraujo2016d  | DeAraujo1_2016  | NPC2                    | Bloom-GSE42826      |                        | HC    | 11  | 52  | 0.91<br>[0.59, 1.00] | 0.96<br>[0.87, 1.00] | 0.99 | Y |             |                 |        | UK, France   |
| 44 | Francisco 2017 | Francisco2017a | Francisco2_2017 | GBP5; KLF2              | NR                  | Random forest          | OD    | 144 | 209 | 0.96<br>[0.91, 0.98] | 0.85<br>[0.80, 0.90] | 0.89 | Y | Whole Blood | Culture & Smear | Adults | China        |
|    |                | Francisco2017b | Sweeney3_2016   | GBP5; DUSP3; KLF2       | NR                  |                        | OD    | 144 | 209 | 0.74<br>[0.66, 0.81] | 0.91<br>[0.86, 0.94] | 0.71 | Y | Whole Blood |                 |        |              |
|    |                | Francisco2017c | Francisco2_2017 | GBP5; KLF2              | NR                  |                        | OD    | 275 | 290 | 0.78<br>[0.73, 0.83] | 0.32<br>[0.27, 0.38] | 0.54 | Y | PBMC        |                 |        |              |
|    |                | Francisco2017d | Sweeney3_2016   | GBP5; DUSP3; KLF2       | NR                  |                        | OD    | 275 | 290 | 0.61<br>[0.55, 0.67] | 0.47<br>[0.41, 0.53] | 0.53 | Y | PBMC        |                 |        |              |
|    |                | Francisco2017e | Francisco2_2017 | GBP5; KLF2              | NR                  |                        | HC    | 144 | 209 | 0.78<br>[0.70, 0.84] | 0.87<br>[0.82, 0.91] | 0.86 | Y | Whole Blood |                 |        |              |
|    |                | Francisco2017f | Sweeney3_2016   | GBP5; DUSP3; KLF2       | NR                  |                        | HC    | 144 | 209 | 0.85<br>[0.79, 0.91] | 0.71<br>[0.64, 0.77] | 0.85 | Y | Whole Blood |                 |        |              |
| 45 | Haung 2015     | Huang2015a     | Huang13_2015    | 13 transcript signature | Bloom-GSE42825      | Support vector machine | OD+HC | 8   | 34  | 1.00<br>[0.63, 1.00] | 0.94<br>[0.80, 0.99] | NR   | Y | PBMC        | Culture         | Adults | UK, France   |



S3\_File: Manuscript-specific supplementary material

|    |              |              |                 |                                            |                  |                           |         |         |    |                      |                      |      |   |             |                 |        |                      |
|----|--------------|--------------|-----------------|--------------------------------------------|------------------|---------------------------|---------|---------|----|----------------------|----------------------|------|---|-------------|-----------------|--------|----------------------|
| 46 | Huang 2018   | Huang2018    | Huang1_2018     | hsa_circRNA_001937                         | NR               | Hierarchical clustering   | HC      | 11<br>5 | 90 | 0.72<br>[0.63, 0.80] | 0.90<br>[0.82, 0.95] | 0.85 | Y | PBMC        | Microbiological | Adults | China                |
| 24 | Kaforou 2013 | Kaforou2013a | Kaforou27_2013  | 27 transcript signature                    | Berry-GSE19491   | Difference of means       | LTBI    | 20      | 31 | 0.95<br>[0.75, 1.00] | 0.94<br>[0.79, 0.99] | 0.99 | Y | Whole Blood | Culture         | Adults | South Africa, Malawi |
|    |              | Kaforou2013b | Kaforou44_2013  | 44 transcript signature                    | Kaforou-GSE37250 |                           | OD      | 20      | 83 | 1.00<br>[0.83, 1.00] | 0.96<br>[0.90, 0.99] | 1.00 | Y |             |                 |        |                      |
|    |              | Kaforou2013c | Berry393_2010   | 393 transcript signature                   | Kaforou-GSE37250 |                           | LTBI    | 97      | 83 | 0.88<br>[0.79, 0.93] | 0.84<br>[0.75, 0.91] | 0.94 | Y |             |                 |        |                      |
|    |              | Kaforou2013d | Berry86_2010    | 86 transcript signature                    | Kaforou-GSE37250 |                           | OD      | 97      | 83 | 0.71<br>[0.61, 0.80] | 0.76<br>[0.65, 0.85] | 0.78 | Y |             |                 |        |                      |
| 50 | Lee 2016     | Lee2016a     | Lee2_2016       | PTPRC; ASUN                                | NR               | Naïve Bayes               | LTBI+HC | 15      | 32 | 0.93<br>[0.68, 1.00] | 1.00<br>[0.89, 1.00] | 0.94 | Y | PBMC        | Smear           | Adults | Taiwan               |
|    |              | Lee2016b     | Lee3_2016       | PTPRC; ASUN; DHX29                         | NR               |                           | LTBI+HC | 15      | 31 | 1.00<br>[0.78, 1.00] | 0.97<br>[0.83, 1.00] | 0.98 | Y |             |                 |        |                      |
| 51 | Leong 2018   | Leong2018a   | Berry393_2010   | 393 transcript signature                   | Leong-GSE101705  | Ridge logistic regression | LTBI    | 28      | 16 | 0.93<br>[0.76, 0.99] | 0.94<br>[0.70, 1.00] | 0.99 | Y | Whole Blood | Culture         | Adults | India                |
|    |              | Leong2018b   | Berry86_2010    | 86 transcript signature                    | Leong-GSE101705  |                           | LTBI    | 28      | 16 | 0.93<br>[0.76, 0.99] | 0.94<br>[0.70, 1.00] | 0.97 | Y |             |                 |        |                      |
|    |              | Leong2018c   | Jacobsen3_2007  | RAB33A; FCGR1A; LTF                        | Leong-GSE101705  |                           | LTBI    | 28      | 16 | 0.86<br>[0.67, 0.96] | 0.88<br>[0.62, 0.98] | 0.90 | Y |             |                 |        |                      |
|    |              | Leong2018d   | Kaforou27_2013  | 27 transcript signature                    | Leong-GSE101705  |                           | LTBI    | 28      | 16 | 0.93<br>[0.76, 0.99] | 0.94<br>[0.70, 1.00] | 0.96 | Y |             |                 |        |                      |
|    |              | Leong2018e   | Sambarey10_2017 | IFI44L; CYP4F3; FCGR1A; TIMM10; BCL6; HK3; | Leong-GSE101705  |                           | LTBI    | 28      | 16 | 0.89<br>[0.72, 0.98] | 0.94<br>[0.70, 1.00] | 0.96 | Y |             |                 |        |                      |

S3\_File: Manuscript-specific supplementary material

|    |                  |               |                 |                                                                                                                                |                         |                                     |      |    |                         |                         |                         |      |                 |                |                        |                               |        |  |
|----|------------------|---------------|-----------------|--------------------------------------------------------------------------------------------------------------------------------|-------------------------|-------------------------------------|------|----|-------------------------|-------------------------|-------------------------|------|-----------------|----------------|------------------------|-------------------------------|--------|--|
|    |                  |               |                 | SMARCD3;<br>RBBP8;<br>RAB13;<br>SLP1                                                                                           |                         |                                     |      |    |                         |                         |                         |      |                 |                |                        |                               |        |  |
|    |                  | Leong2018f    | Sweeney3_2016   | GBP5;<br>DUSP3;<br>KLF2                                                                                                        | Leong-<br>GSE101705     |                                     | LTBI | 28 | 16                      | 0.86<br>[0.67,<br>0.96] | 0.81<br>[0.54,<br>0.96] | 0.90 | Y               |                |                        |                               |        |  |
|    |                  | Leong2018g    | Zak16_2016      | 16 transcript<br>signature                                                                                                     | Leong-<br>GSE101705     |                                     | LTBI | 28 | 16                      | 0.93<br>[0.76,<br>0.99] | 0.94<br>[0.70,<br>1.00] | 0.96 | Y               |                |                        |                               |        |  |
|    |                  | Leong2018h    | Leong24_2018    | 24 transcript<br>signature                                                                                                     | Leong-<br>GSE101705     |                                     | LTBI | 28 | 16                      | 0.93<br>[0.76,<br>0.99] | 0.94<br>[0.70,<br>1.00] | 0.98 | N               |                |                        |                               |        |  |
| 52 | Lu 2011          | Lu2011        | Lu3_2011        | CXCL10;<br>ATP10A;<br>TLR6                                                                                                     | NR                      | Decision<br>tree                    | LTBI | 17 | 19                      | 0.71<br>[0.44,<br>0.90] | 0.89<br>[0.67,<br>0.99] | NR   | Y               | PBMC           | Culture                | Adolescen<br>ts and<br>Adults | China  |  |
| 54 | Pan 2017         | Pan2017a      | Pan2_2017       | RETN;<br>KLK1                                                                                                                  | NR                      | Pairwise<br>comparison              | HC   | 66 | 86                      | 0.85<br>[0.74,<br>0.92] | 0.90<br>[0.81,<br>0.95] | 0.94 | Y               | PBMC           | Culture or 2<br>Smears | Adults                        | China  |  |
|    |                  | Pan2017b      | Pan2_2017       | RETN;<br>KLK1                                                                                                                  | NR                      |                                     | LTBI | 66 | 78                      | 0.71<br>[0.59,<br>0.82] | 0.94<br>[0.86,<br>0.98] | 0.92 | Y               |                |                        |                               |        |  |
| 56 | Sambarey<br>2017 | Sambarey2017a | Sambarey10_2017 | 10 transcript<br>signature<br>(IFI44L;<br>CYP4F3;<br>FCGR1A;<br>TIMM10;<br>BCL6; HK3;<br>SMARCD3;<br>RBBP8;<br>RAB13;<br>SLPI) | Kaforou-<br>GSE37250    | Linear-<br>discriminant<br>analysis | LTBI | 51 | 36                      | 0.82<br>[0.69,<br>0.92] | 0.92<br>[0.78,<br>0.98] | NR   | Y               | Whole<br>Blood | Culture                | Adults                        | Malawi |  |
|    |                  | Sambarey2017b | Sambarey10_2017 | Kaforou-<br>GSE37250                                                                                                           | OD                      |                                     | 51   | 34 | 0.92<br>[0.81,<br>0.98] | 0.47<br>[0.30,<br>0.65] | NR                      | Y    | Malawi          |                |                        |                               |        |  |
|    |                  | Sambarey2017c | Sambarey10_2017 | Kaforou-<br>GSE37250                                                                                                           | LTBI                    |                                     | 47   | 47 | 0.79<br>[0.64,<br>0.89] | 0.91<br>[0.80,<br>0.98] | NR                      | Y    | South<br>Africa |                |                        |                               |        |  |
|    |                  | Sambarey2017d | Sambarey10_2017 | Kaforou-<br>GSE37250                                                                                                           | OD                      |                                     | 47   | 49 | 0.68<br>[0.53,<br>0.81] | 0.80<br>[0.66,<br>0.90] | NR                      | Y    | South<br>Africa |                |                        |                               |        |  |
| 58 | Sweeney<br>2016  | Sweeney2016a  | Sweeney3_2016   |                                                                                                                                | Maertzdolf-<br>GSE28623 | Forward<br>search                   | HC   | 46 | 37                      | 0.85<br>[0.71,<br>0.94] | 0.81<br>[0.65,<br>0.92] | NR   | Y               | Whole<br>Blood | Smear<br>+<br>CXR      | Adults                        | Gambia |  |

S3\_File: Manuscript-specific supplementary material

|    |             |              |                |                                |                         |                              |         |         |     |                         |                         |                         |    |                |                    |                |                              |           |
|----|-------------|--------------|----------------|--------------------------------|-------------------------|------------------------------|---------|---------|-----|-------------------------|-------------------------|-------------------------|----|----------------|--------------------|----------------|------------------------------|-----------|
|    |             | Sweeney2016b | Sweeney3_2016  | GBP5;<br>DUSP3;<br>KLF2        | Maertzdorf-<br>GSE34608 |                              | HC      | 8       | 18  | 1.00<br>[0.63,<br>1.00] | 1.00<br>[0.81,<br>1.00] | NR                      | Y  |                | Culture            | Adults         | Germany                      |           |
|    |             | Sweeney2016c | Sweeney3_2016  |                                |                         | Ottenhoff-<br>GSE56153       |         | HC      | 18  | 18                      | 0.61<br>[0.36,<br>0.83] | 0.67<br>[0.41,<br>0.87] | NR | Y              |                    | Smear          | Adolescents<br>and<br>adults | Indonesia |
|    |             | Sweeney2016d | Sweeney3_2016  |                                |                         | Maertzdorf-<br>GSE28623      |         | LTBI    | 46  | 25                      | 0.87<br>[0.74,<br>0.95] | 0.84<br>[0.64,<br>0.95] | NR | Y              |                    | Smear +<br>CXR | Adults                       | Gambia    |
|    |             | Sweeney2016e | Sweeney3_2016  |                                |                         | Maertzdorf-<br>GSE34608      |         | OD      | 8   | 18                      | 0.50<br>[0.16,<br>0.84] | 0.61<br>[0.36,<br>0.83] | NR | Y              |                    | Culture        | Adults                       | Germany   |
| 59 | Walter 2016 | Walter2016a  | Walter47_2016  | 47 transcript<br>signature     | Kaforou-<br>GSE37250    | Support<br>vector<br>machine | OD      | 97      | 83  | 0.90<br>[0.82,<br>0.95] | 0.77<br>[0.67,<br>0.86] | 0.91                    | Y  | Whole<br>Blood | Culture            | Adults         | South<br>Africa,<br>Malawi   |           |
|    |             | Walter2016b  | Walter51_2016  | 51 transcript<br>signature     | Kaforou-<br>GSE37250    |                              | LTBI    | 97      | 83  | 0.91<br>[0.83,<br>0.96] | 0.87<br>[0.78,<br>0.93] | 0.95                    | Y  |                |                    |                |                              |           |
|    |             | Walter2016c  | Walter119_2016 | 119<br>transcript<br>signature | Kaforou-<br>GSE37250    |                              | OD+LTBI | 11<br>7 | 146 | 0.88<br>[0.81,<br>0.93] | 0.80<br>[0.73,<br>0.86] | 0.91                    | Y  |                |                    |                |                              |           |
|    |             | Walter2016d  | Berry393_2010  | 393<br>transcript<br>signature | Walter-<br>GSE73408     |                              | LTBI    | 35      | 35  | 0.89<br>[0.73,<br>0.97] | 0.94<br>[0.81,<br>0.99] | 0.94                    | Y  | Whole<br>Blood | Culture<br>Smear + | Adults         | USA                          |           |
|    |             | Walter2016e  | Berry86_2010   | 86 transcript<br>signature     | Walter-<br>GSE73408     |                              | OD      | 35      | 39  | 0.91<br>[0.77,<br>0.98] | 0.74<br>[0.58,<br>0.87] | 0.90                    | Y  |                |                    |                |                              |           |
|    |             | Walter2016f  | Bloom144_2010  | 144<br>transcript<br>signature | Walter-<br>GSE73408     |                              | OD+LTBI | 35      | 74  | 0.86<br>[0.70,<br>0.95] | 0.77<br>[0.66,<br>0.86] | 0.91                    | Y  |                |                    |                |                              |           |
|    |             | Walter2016g  | Kaforou27_2013 | 27 transcript<br>signature     | Walter-<br>GSE73408     |                              | LTBI    | 35      | 35  | 0.94<br>[0.81,<br>0.99] | 0.91<br>[0.77,<br>0.98] | 0.98                    | Y  |                |                    |                |                              |           |
|    |             | Walter2016h  | Kaforou44_2013 | 44 transcript<br>signature     | Walter-<br>GSE73408     |                              | OD      | 35      | 39  | 0.69<br>[0.51,<br>0.83] | 0.79<br>[0.64,<br>0.91] | 0.83                    | Y  |                |                    |                |                              |           |

S3\_File: Manuscript-specific supplementary material

|    |                |                |                |                                                                                                                                             |                      |                        |            |    |     |                      |                      |      |   |             |         |                        |              |
|----|----------------|----------------|----------------|---------------------------------------------------------------------------------------------------------------------------------------------|----------------------|------------------------|------------|----|-----|----------------------|----------------------|------|---|-------------|---------|------------------------|--------------|
|    |                | Walter2016i    | Kaforou53_2013 | 53 transcript signature                                                                                                                     | Walter-GSE73408      |                        | OD+LTBI    | 35 | 74  | 0.77<br>[0.60, 0.90] | 0.76<br>[0.64, 0.85] | 0.83 | Y |             |         |                        |              |
| 60 | Warsinske 2018 | Warsinske2018a | Sweeney3_2016  | GBP5; DUSP3; KLF2                                                                                                                           | Zak-GSE79362         | Forward search         | OD+HC+LTBI | 17 | 187 | 0.90<br>[0.84, 0.94] | 0.70<br>[0.63, 0.77] | NR   | Y | Whole Blood | Culture | Adolescents and adults | China        |
| 25 | Zak 2016       | Zak2016a       | Zak16_2016     | 16 transcript signature (GBP2; FCGR1A; FCGR1B; GBP5; STAT1; SERPING1; ANKRD22; BATF2; GBP1; APOL1; TRAFD1; SCARF1; SEPT4; TAP1; ETV7; GPB4) | Berry-GSE19444       | Support vector machine | LTBI       | 21 | 21  | 0.90<br>[0.70, 0.99] | 0.52<br>[0.30, 0.74] | 0.86 | Y | Whole Blood | Culture | Adults                 | UK           |
|    |                | Zak2016b       | Zak16_2016     |                                                                                                                                             | Berry-GSE19442       |                        | LTBI       | 20 | 30  | 0.90<br>[0.68, 0.99] | 1.00<br>[0.88, 1.00] | 0.99 | Y |             |         |                        | South Africa |
|    |                | Zak2016c       | Zak16_2016     |                                                                                                                                             | Berry-GSE19444       |                        | HC         | 21 | 12  | 0.90<br>[0.70, 0.99] | 0.67<br>[0.35, 0.90] | 0.91 | Y |             |         |                        | UK           |
|    |                | Zak2016d       | Zak16_2016     |                                                                                                                                             | Kaforou-GSE37250     |                        | LTBI       | 51 | 35  | 0.90<br>[0.79, 0.97] | 0.71<br>[0.54, 0.85] | 0.91 | Y |             |         |                        | Malawi       |
|    |                | Zak2016e       | Zak16_2016     |                                                                                                                                             | Kaforou-GSE37250     |                        | LTBI       | 46 | 48  | 0.91<br>[0.79, 0.98] | 0.94<br>[0.83, 0.99] | 0.94 | Y |             |         |                        | SA           |
|    |                | Zak2016f       | Zak16_2016     |                                                                                                                                             | Bloom-GSE42825/26/30 |                        | HC         | 35 | 113 | 0.91<br>[0.77, 0.98] | 0.98<br>[0.94, 1.00] | 0.99 | Y |             |         |                        | UK, France   |
|    |                | Zak2016g       | Zak16_2016     |                                                                                                                                             | Bloom-GSE42825/26/30 |                        | OD         | 35 | 16  | 0.91<br>[0.77, 0.98] | 0.88<br>[0.62, 0.98] | 0.95 | Y |             |         |                        | UK, France   |
|    |                | Zak2016h       | Zak16_2016     |                                                                                                                                             | Bloom-GSE42825/26/30 |                        | OD         | 35 | 14  | 0.89<br>[0.73, 0.97] | 0.93<br>[0.66, 1.00] | 0.91 | Y |             |         |                        | UK, France   |
|    |                | Zak2016i       | Zak16_2016     |                                                                                                                                             | Bloom-GSE42825/26/30 |                        | OD         | 35 | 61  | 0.91<br>[0.77, 0.98] | 0.62<br>[0.49, 0.74] | 0.83 | Y |             |         |                        | UK, France   |
|    |                | Zak2016j       | Zak16_2016     |                                                                                                                                             | Kaforou-GSE37250     |                        | OD         | 51 | 34  | 0.90<br>[0.79, 0.97] | 0.47<br>[0.30, 0.65] | 0.74 | Y |             |         |                        | Malawi       |

S3\_File: Manuscript-specific supplementary material

|    |                   |                  |                    |                                                                              |                     |                                |         |         |     |                      |                      |      |   |             |                 |                        |              |
|----|-------------------|------------------|--------------------|------------------------------------------------------------------------------|---------------------|--------------------------------|---------|---------|-----|----------------------|----------------------|------|---|-------------|-----------------|------------------------|--------------|
|    |                   | Zak2016k         | Zak16_2016         |                                                                              | Kaforou-GSE37250    |                                | OD      | 46      | 49  | 0.89<br>[0.76, 0.96] | 0.78<br>[0.63, 0.88] | 0.83 | Y |             |                 |                        | South Africa |
|    |                   | Zak2016l         | Zak16_2016         |                                                                              | Bloom-GSE40553      |                                | LTBI    | 29      | 38  | 0.90<br>[0.73, 0.98] | 0.92<br>[0.79, 0.98] | 0.98 | Y |             |                 |                        | UK, France   |
| 40 | Cai 2014          | Cai2014a         | Cai1_2014          | C1QC                                                                         | Cai-GSE54992        | Support vector machine         | HC      | 16<br>2 | 45  | 0.83<br>[0.76, 0.88] | 0.89<br>[0.76, 0.96] | 0.93 | N | PBMC        | Culture         | Adults                 | China        |
|    |                   | Cai2014b         | Cai1_2014          |                                                                              | Cai-GSE54992        |                                | LTBI    | 16<br>5 | 162 | 0.74<br>[0.67, 0.80] | 0.82<br>[0.75, 0.88] | 0.84 | N |             |                 |                        |              |
| 41 | Darboe 2018       | Darboe2018       | Darboe11_2018      | (GBP2; FCGR1B; GBP5; STAT1; SERPING1; BATF2; GBP1; TRAFD1; SCARF1; TAP1;ETV7 | NR                  | Support vector machine         | LTBI    | 30      | 30  | 1.00<br>[0.88, 1.00] | 0.80<br>[0.61, 0.92] | 0.97 | N | PBMC        | Xpert MTB/RIF   | Adults                 | Indonesia    |
| 62 | Lesho 2011        | Lesho2011        | Lesho127_2011      | 127 transcript signature                                                     | NR                  | Supervised learning algorithms | LTBI+HC | 5       | 18  | 1.00<br>[0.48, 1.00] | 1.00<br>[0.81, 1.00] | NR   | N | PBMC        | Culture         | Adults                 | USA          |
| 53 | Maertzdorf 2011   | Maertzdorf3_2011 | Maertzdorf3_2011   | CD64; LTF; RAB33A                                                            | Maertzdorf-GSE25534 | Random Forest                  | LTBI    | 32      | 34  | 0.88<br>[0.71, 0.96] | 0.91<br>[0.76, 0.98] | NR   | N | Whole Blood | Culture         | Adolescents and adults | SA           |
|    |                   | Maertzdorf5_2011 | Maertzdorf5_2011   | FCGR1B; CD64;GBP5 LTF; GZMA                                                  | Maertzdorf-GSE25534 |                                | LTBI    | 32      | 34  | 0.94<br>[0.79, 0.99] | 0.97<br>[0.85, 1.00] | NR   | N |             |                 |                        |              |
| 39 | Satproedprai 2015 | Satproedprai2015 | Satproedprai7_2015 | FCGR1A; FCGR1B variant 1; FCGR1B variant 2; MAFB; APOL1;                     | NR                  | Logistic regression            | HC      | 40      | 56  | 0.82<br>[0.67, 0.93] | 1.00<br>[0.94, 1.00] | 0.97 | N | Whole Blood | Culture + Smear | Adults                 | Thailand     |

### S3\_File: Manuscript-specific supplementary material

|    |              |             |               |                                 |    |                      |         |    |    |                      |                      |      |   |      |                 |        |        |
|----|--------------|-------------|---------------|---------------------------------|----|----------------------|---------|----|----|----------------------|----------------------|------|---|------|-----------------|--------|--------|
|    |              |             |               | STAT1;<br>KAZN                  |    |                      |         |    |    |                      |                      |      |   |      |                 |        |        |
| 57 | Serrano 2016 | Serrano2016 | Serrano2_2016 | NCF1; ORM                       | NR | Analysis of variance | LTBI+HC | 10 | 20 | 0.90<br>[0.55, 1.00] | 0.80<br>[0.56, 0.94] | NR   | N | PBMC | Culture + Smear | Adults | Mexico |
| 61 | Wu 2007      | Wu2007      | Wu3_2007      | IL-8;<br>FOXP3; IL-12 $\beta$ , | NR | Logistic regression  | LTBI    | 30 | 24 | 0.97<br>[0.83, 1.00] | 0.88<br>[0.68, 0.97] | 0.97 | N | PBMC | Culture or CXR  | Adults | USA    |

AUC; Area under the curve, UK; United Kingdom, USA; United States of America, Sens; Sensitivity, Spec; Specificity, LTBI; Latent TB infection, HHC; Household TB Contact. \* Signature discovery method applies to the signature that was discovered in that article.

**Table 2.** Characteristics of studies for predicting progression to TB disease included in the systematic review.

| Ref. | Study Name     | Study Entry ID | Signature Name | Biomarker Description        | Dataset          | Signature discovery model | Population type | Total enrolled | Progressed to TB | Did not Progress to TB | AUC  | Index Sample | TB reference standard | Population  | Sample Country |
|------|----------------|----------------|----------------|------------------------------|------------------|---------------------------|-----------------|----------------|------------------|------------------------|------|--------------|-----------------------|-------------|----------------|
| 55   | Roe 2019       | Roe2019b       | Roe3_2019      | BATF2; GBP5; SCARF1;         | Roe-E-MTAB6385   | Stability selection       | HHC             | 333            | 6                | 327                    | NR   | Whole blood  | Culture               | Adults      | UK             |
| 26   | Suliman 2018   | Suliman2018b   | Suliman4_2018  | GAS6; SEPT4; CD1C; BLK       | Zak-GSE79362     | Pair ratio                | LTBI            | 145            | 41               | 104                    | 0.69 | Whole blood  | Culture or 2 Smears   | Adults      | South Africa   |
| 60   | Warsinske 2018 | Warsinske2018b | Sweeney3_2016  | GBP5; DUSP3; KLF2            | Zak-GSE79362     | Forward search            | LTBI            | 144            | 43               | 101                    | 0.86 | Whole blood  | Culture or 2 Smears   | Adolescents | South Africa   |
| 25   | Zak 2016       | Zak2016p       | Zak16_2016     | Refer to 25 in table 1 above | Suliman-GSE94438 | Support vector machine    | HHC             | 374            | 73               | 301                    | 0.72 | Whole blood  | Culture & Smear       | Adults      | USA            |

AUC; Area under the curve, UK; United Kingdom, USA; United States of America, LTBI; Latent TB infection, HC; Healthy control, OD; Other diseases

**Table 3.** Performance of Signatures for predicting progression to TB disease.

| Study Name     | Signature     | Time window before TB (months) | Sensitivity | Specificity | PPV   | NPV   |
|----------------|---------------|--------------------------------|-------------|-------------|-------|-------|
| Roe2019b       | Roe3_2019     | 12                             | 66.7%       | 98.8%       | 52.7% | 99.3% |
| Suliman2018b   | Suliman4_2018 | 24                             | 75.6%       | 54.8%       | 3.3%  | 99.1% |
| Warsinske2018b | Sweeney3_2016 | 6                              | 86.0%       | 84.2%       | 10.0% | 99.7% |
| Zak2016p       | Zak16_2016    | 12                             | 53.4%       | 82.7%       | 5.9%  | 98.9% |

PPV and NPV where calculated at 2% pre-test probability. PPV; Positive predictive value, NPV; Negative predictive value
